# Supplementary material
Source: publisher figshare collection journal article supplement (https://tandf.figshare.com/articles/dataset/_/5688940)
Supplement: Supplementary file 2 [file 1]

Archive with 4 entries (4 files):
- tjsp_a_1403493_sm2287.pdf
- tjsp_a_1403493_sm2286.pdf
- tjsp_a_1403493_sm2277.pdf
- tjsp_a_1403493_sm2276.pdf
