# Supplementary material
Source: publisher figshare collection journal article supplement (https://tandf.figshare.com/articles/dataset/_/5688940)
Supplement: Supplementary file 2 [file 1 › tjsp_a_1403493_sm2286.pdf]

[illegible]





[illegible]



[illegible]
